# Supplementary material for: Maize AKINβγ Proteins Interact with P8 of Rice Black Streaked Dwarf Virus and Inhibit Viral Infection
Source: MDPI journal article supplement (doi:10.3390/v12121387), 2020-12-04
Supplement: s1 [file s1]

**Supplemental Table S1. Constructs and corresponding primers used in this study**

| Construct                           | Vector     | Primer sequence (5'-3')                                                                      |
|-------------------------------------|------------|----------------------------------------------------------------------------------------------|
| <b>Y2H assay</b>                    |            |                                                                                              |
| BD-P8                               | pGBKT7     | F: ATTCCATGGAGATGACTGGCACCCATGAC<br>R: GCCGGATCCCTTACACAATAATAGATGCAG                        |
| BD-SP8                              | pGBKT7     | F: GCTCATATGATGATTGGCACCTATGATGA<br>R: ATTGGATCCCTTAGCAAAGAATAGACACAGC                       |
| BD-P5-1                             | pGBKT7     | F: ATTC <del>CCGGG</del> TATGACATATTCGAAAGTG<br>R: TAA <del>GTCGAC</del> GTCACGTTGAAGATGGTTG |
| BD-P5-2                             | pGBKT7     | F: ATTCCATGGAGATGACAAAATTTCCACTTG<br>R: GAAGGATCCCTCAGAGATGAAGCATGAC                         |
| BD-P6                               | pGBKT7     | F: ATTCCATGGAGATGTCTGCCCACCTGACC<br>R: GCCGGATCCCTTACTCAGAGCTTAGTTGCC                        |
| BD-P7-1                             | pGBKT7     | F: ATTGGATCCGTATGGATAGACCTGCTCGA<br>R: GCCCTGCAGGTTAAGCAGAAGGAGATGA                          |
| BD-P7-2                             | pGBKT7     | F: GATCCATGGAGATGAATTACACTTTAGG<br>R: CTCGGATCCCTTAAGAATTCAGTATCTT                           |
| BD-P9-1                             | pGBKT7     | F: ATTCCATGGAGATGGCAGACCAAGAGC<br>R: CCAGGATCCCTCAAACGTCCAATTC                               |
| BD-P9-2                             | pGBKT7     | F: ATTCCATGGAGATGAATCCCCAATCTT<br>R: CACGGATCCCTTAATTA <del>AAAA</del> AGCGTATAG             |
| BD-P10                              | pGBKT7     | F: ATTCCATGGAGATGGCTGACATAAGACTC<br>R: GATGGATCCCTCATCTTGTCACTTTGTT                          |
| AD-ZmAKIN $\beta\gamma$ -2          | pGADT7     | F: ATTGAATTCATGTTCTCGCACGGCGCTG<br>R: CACGGATCCCTCACAAGCTCAGCAAGAAC                          |
| AD-ZmAKIN $\beta\gamma$ -1          | pGADT7     | F: ATTGAATTCATGTTCTCGCACGGCGC<br>R: CCTGGATCCCTCACAAGCTCAGCAAGAAC                            |
| AD-OsAKIN $\beta\gamma$             | pGADT7     | F: ATTATCGATACATGTTTCCCACGGCGC<br>R: GCCCTCGAGCTTAGCTCAGCAAGAACTTG                           |
| AD-NbAKIN $\beta\gamma$             | pGADT7     | F: ACGATCGATACATGTTTGGGTCTGGGAG<br>R: ATTGGATCCCGCAGCCGAGCAAGAAC                             |
| AD-ZmAKIN $\beta\gamma$ -2(1-153)   | pGADT7     | F: The same as for AD-ZmAKIN $\beta\gamma$ -2<br>R: GCAGGATCCCTCACTCTGAAACTCTCAGAGTAC        |
| AD-ZmAKIN $\beta\gamma$ -2(154-496) | pGADT7     | F: GCCGAATTCATGGCTGCAATACAAATATCTAG<br>R: ATTGGATCCCTCACAAGCTCAGCAAGAAC                      |
| AD-ZmAKIN $\beta\gamma$ -2(1-237)   | pGADT7     | F: The same as for AD-ZmAKIN $\beta\gamma$ -2<br>R: ACTGGATCCCGAGCCATGAGTTTCTAG              |
| AD-ZmAKIN $\beta\gamma$ -2(1-333)   | pGADT7     | F: The same as for AD-ZmAKIN $\beta\gamma$ -2<br>R: GCTGGATCCCGAGTTGAGTTTTTGAAGTATC          |
| AD-ZmAKIN $\beta\gamma$ -2(1-415)   | pGADT7     | F: The same as for AD-ZmAKIN $\beta\gamma$ -2<br>R: GCTGGATCCCTGTGTAGACCTTGTCTTT             |
| <b>BiFC assay</b>                   |            |                                                                                              |
| P8-YFP <sup>N</sup>                 | pSPYNE-35S | F: CAGACTAGTATGACTGGCACCCATGAC<br>R: GACCTCGAGCACATAATAGATGCAGC                              |

|                                 |            |                                                                                                  |
|---------------------------------|------------|--------------------------------------------------------------------------------------------------|
| P8-YFP <sup>C</sup>             | pSPYCE-35S | F: The same as for P8-YFP <sup>N</sup><br>R: The same as for P8-YFP <sup>N</sup>                 |
| ZmAKINβγ-2-YFP <sup>C</sup>     | pSPYCE-35S | F: ATT <u>ACTAGT</u> ATGTTCTCGCACGGCGCTG<br>R: AGA <u>CTCGAG</u> CAAGCTCAGCAAGAACTTG             |
| ZmAKINβγ-2-YFP <sup>N</sup>     | pSPYNE-35S | F: The same as for ZmAKINβγ-2-YFP <sup>C</sup><br>R: The same as for ZmAKINβγ-2-YFP <sup>C</sup> |
| ZmAKINβγ-1-YFP <sup>C</sup>     | pSPYCE-35S | F: The same as for ZmAKINβγ-2-YFP <sup>C</sup><br>R: The same as for ZmAKINβγ-2-YFP <sup>C</sup> |
| pUC-P8-YFP <sup>N</sup>         | pUC-SPYNE  | F: The same as for P8-YFP <sup>N</sup><br>R: The same as for P8-YFP <sup>N</sup>                 |
| pUC-ZmAKINβγ-2-YFP <sup>C</sup> | pUC-SPYCE  | F: The same as for ZmAKINβγ-2-YFP <sup>C</sup><br>R: The same as for ZmAKINβγ-2-YFP <sup>C</sup> |
| pUC-ZmAKINβγ-1-YFP <sup>C</sup> | pUC-SPYCE  | F: The same as for ZmAKINβγ-2-YFP <sup>C</sup><br>R: The same as for ZmAKINβγ-2-YFP <sup>C</sup> |
| <b>Subcellular localization</b> |            |                                                                                                  |
| ZmAKINβγ-1-GFP                  | pGD-eGFP   | F: ATT <u>AGATCT</u> ATGTTCTCGCACGGCGC<br>R: CAAG <u>TCGACCA</u> AGCTCAGCAAGAACTTG               |
| ZmAKINβγ-2-GFP                  | pGD-eGFP   | F: The same as for ZmAKINβγ-1-GFP<br>R: The same as for ZmAKINβγ-1-GFP                           |
| GFP-P8                          | pGD-eGFP   | F: ATT <u>CTGCAGT</u> CATGACTGGCACCCATGA<br>R: CGC <u>GGATCCT</u> TACACAATAATAGATGCAG            |
| ZmAKINβγ-1-RFP                  | pGD-RFP    | F: The same as for ZmAKINβγ-1-GFP<br>R: The same as for ZmAKINβγ-1-GFP                           |
| ZmAKINβγ-2-RFP                  | pGD-RFP    | F: The same as for ZmAKINβγ-1-GFP<br>R: The same as for ZmAKINβγ-1-GFP                           |
| <b>BMV VIGS</b>                 |            |                                                                                                  |
| BMV- <i>ZmAKINβγs</i>           | pC13/F3    | F: ATTC <u>CCTAGGA</u> ACAGTCGTCCATTGGC<br>R: ACT <u>CCATGGC</u> GAACATGTGTGTAGAC                |

---

The single-underlined letters indicate the enzymatic restriction sites
