# Supplementary material for: Maize AKINβγ Proteins Interact with P8 of Rice Black Streaked Dwarf Virus and Inhibit Viral Infection
Source: MDPI journal article supplement (doi:10.3390/v12121387), 2020-12-04
Supplement: s1 [file s1]

**Supplemental Table S2. Primers used for RT-qPCR analyses in this study**

| Primer name | Primer sequence (5'-3') | Usage                                                                       |
|-------------|-------------------------|-----------------------------------------------------------------------------|
| qZMAK1-F    | ATGGAGCGACTGGCTAATCC    | RT-qPCR analysis of <i>ZmAKIN<math>\beta</math>-1</i> gene                  |
| qZMAK1-R    | CAGACCATGAATTCCAACAGCC  |                                                                             |
| qZMAK2-F    | TGAAGGTGATGGAGCGACTG    | RT-qPCR analysis of <i>ZmAKIN<math>\beta</math>-2</i> gene                  |
| qZMAK2-R    | CCCTGACGATAGCCAATTATCC  |                                                                             |
| qZMAK-F     | CATTGGCTATGTTGCGACCT    | RT-qPCR analysis of <i>ZmAKIN<math>\beta</math></i> genes simultaneously    |
| qZMAK-R     | AAAGGCGTATTGGCATCTTG    |                                                                             |
| qP2-F       | CACAAAGAGAGCGAGAGTGACA  | RT-qPCR analysis of RBSDV                                                   |
| qP2-R       | TGTAGCAGGTTGAACTGGGTC   |                                                                             |
| qIvr1-F     | GGCAACGACGACTTCTCTATGA  | RT-qPCR analysis of <i>invertase1</i> gene                                  |
| qIvr1-R     | TGCTCCCTGCTCCCTCTTAT    |                                                                             |
| qSuS2-F     | TCTATGAAGCGTTCGGTCTCA   | RT-qPCR analysis of <i>sucrose synthase 2</i> gene                          |
| qSuS2-R     | GCCATCAGATTAGCAGCCTG    |                                                                             |
| qSuS1-F     | GGAGAACGAAATGCTGCTGA    | RT-qPCR analysis of <i>sucrose synthase 1</i>                               |
| qSuS1-R     | TCCACTTGCGAACGATTCC     |                                                                             |
| qSPS1-F     | GCTTCAGGTTGTCCCTCTGC    | RT-qPCR analysis of <i>sucrose phosphate synthase 1</i> gene                |
| qSPS1-F     | TCCTCACCAGTGCTTCCGAA    |                                                                             |
| qPhos-F     | CCCAAGGATGCCAAGGAAA     | RT-qPCR analysis of <i>Phosphoglucomutase</i> gene                          |
| qPhos-R     | GCACGCTTTGACGAATGTG     |                                                                             |
| qSSIV-F     | GCGAAATGGCTTCACCTTT     | RT-qPCR analysis of <i>starch synthase IV</i> gene                          |
| qSSIV-R     | TCTGCTGTTTATGCCGCTG     |                                                                             |
| qSSIIIb2-F  | CAAGAGGGTAATGGAGCAAGA   | RT-qPCR analysis of <i>starch synthase IIIb-2</i> gene                      |
| qSSIIIb2-R  | ACGTCGTA CTGTTGTTTTGCA  |                                                                             |
| qSSIIIb1-F  | GCATTGGTGTGATTGGG       | RT-qPCR analysis of <i>starch synthase IIIb-1</i> gene                      |
| qSSIIIb1-R  | CAGCCTTTATTCTTTCGGCAC   |                                                                             |
| qAGPaseLS-F | TTGTTGGAGTTCGTTCTCGG    | RT-qPCR analysis of <i>ADP-glucose pyrophosphorylase large subunit</i> gene |
| qAGPaseLS-R | CCCTATCCTCGCATTCTTGTC   |                                                                             |
| qPhos1-F    | TCTTTGTGACACCGTCGGA     | RT-qPCR analysis of <i>Phosphoglucomutase 1</i> gene                        |
| qPhos1-R    | TCCATCCAGTAGGCACCTCA    |                                                                             |
| qSBEIII-F1  | GCTCTGTTGGTTCTGTTGACG   | RT-qPCR analysis of <i>starch branching enzyme III</i> gene                 |
| qSBEIII-R1  | AGTTCCCATGCCGATTAGC     |                                                                             |
| qUBI-F      | GGAAAAACCATAACCCTGGA    | RT-qPCR analysis of <i>Ubiquitin</i> gene as internal control               |
| qUBI-R      | ATATGGAGAGAGGGCACCAG    |                                                                             |
