# Supplementary material for: Maize AKINβγ Proteins Interact with P8 of Rice Black Streaked Dwarf Virus and Inhibit Viral Infection
Source: Viruses. 2020 Dec 4;12(12):1387. doi: 10.3390/v12121387 (PMC7761811; doi:10.3390/v12121387)
Supplement: Supplementary file 1 [file viruses-12-01387-s001.zip]

Archive with 8 entries (8 files):
- Fig S1.png
- Fig S2.jpg
- Fig S3.jpg
- Fig S4.jpg
- Fig S5.jpg
- Figure legends of the supplementary figures.pdf
- Supplemental Table S1.pdf
- Supplemental Table S2.pdf
